# Supplementary material for: Experimental and modelling studies of carbon dioxide capture onto pristine, nitrogen-doped, and activated ordered mesoporous carbons
Source: Royal Society of Chemistry journal article supplement (doi:10.1039/d2ra07171a), 2023-01-01
Supplement: d2ra07171a1.pdf [file d2ra07171a1.pdf]

*Electronic Supplementary Material (ESI)*

**Experimental and modelling studies of carbon dioxide capture onto pristine, nitrogen-doped and activated ordered mesoporous carbons**

**Talla Venkata Rama Mohan <sup>a</sup>, Palla Sridhar <sup>b</sup>, Parasuraman Selvam <sup>a,c\*</sup>**

*<sup>a</sup> National Centre for Catalysis Research and Department of Chemistry, Indian Institute of Technology-Madras, Chennai 600 036, India*

*<sup>b</sup> Department of Chemical Engineering, Indian Institute of Technology-Madras, Chennai 600 036, India*

*<sup>c</sup> International Research Organization for Advanced Science and Technology, Kumamoto University, 2-39-1 Kurokami, Kumamoto 860-8555, Japan*

\*Corresponding Author. Tel.: +91 -44-2257-4235/4200 E-mail: selvam@iitm.ac.in (P. Selvam)

This PDF file includes: ESI Figures S1-S12 and Tables S1-S2

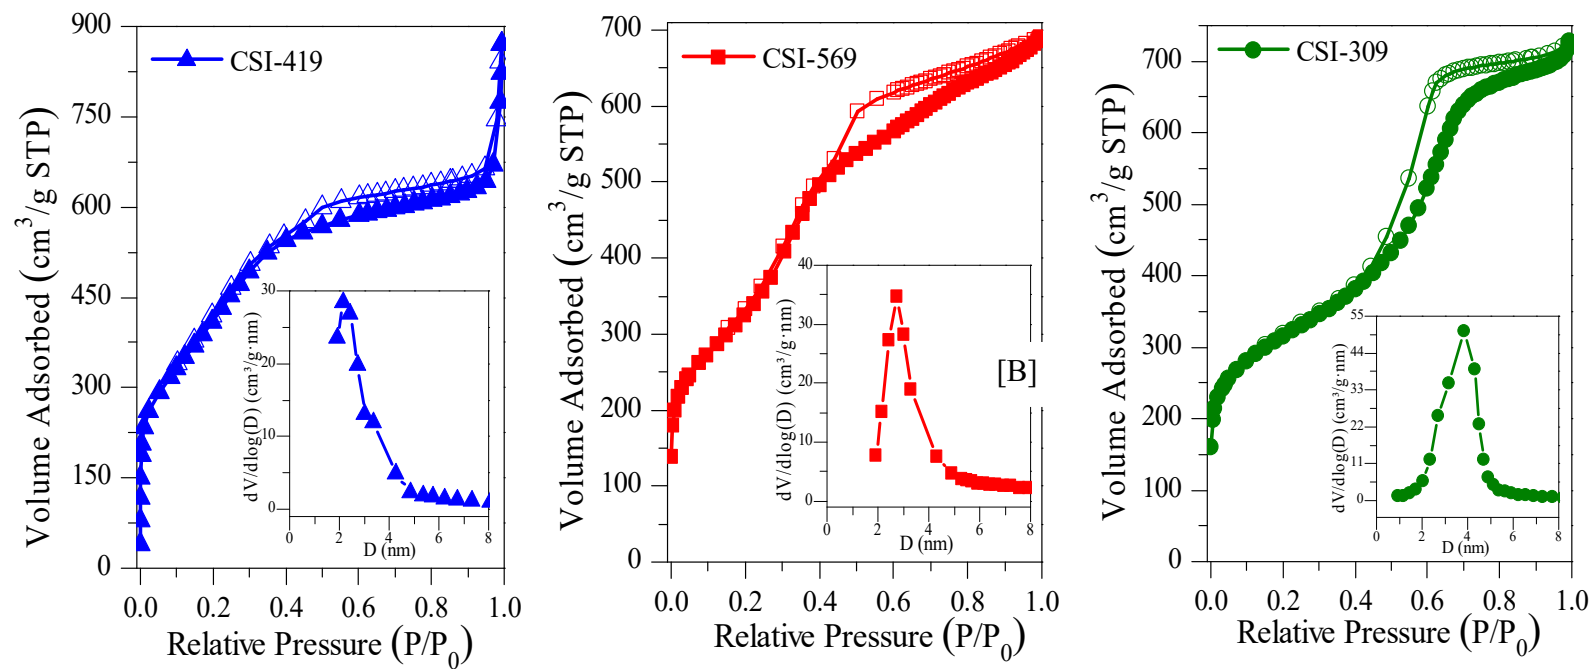

**Figure S1.** N<sub>2</sub>-sorption isotherm of various 1D-hexagonal OMCs pyrolysed at 900°C. Inset: BJH pore size distribution.

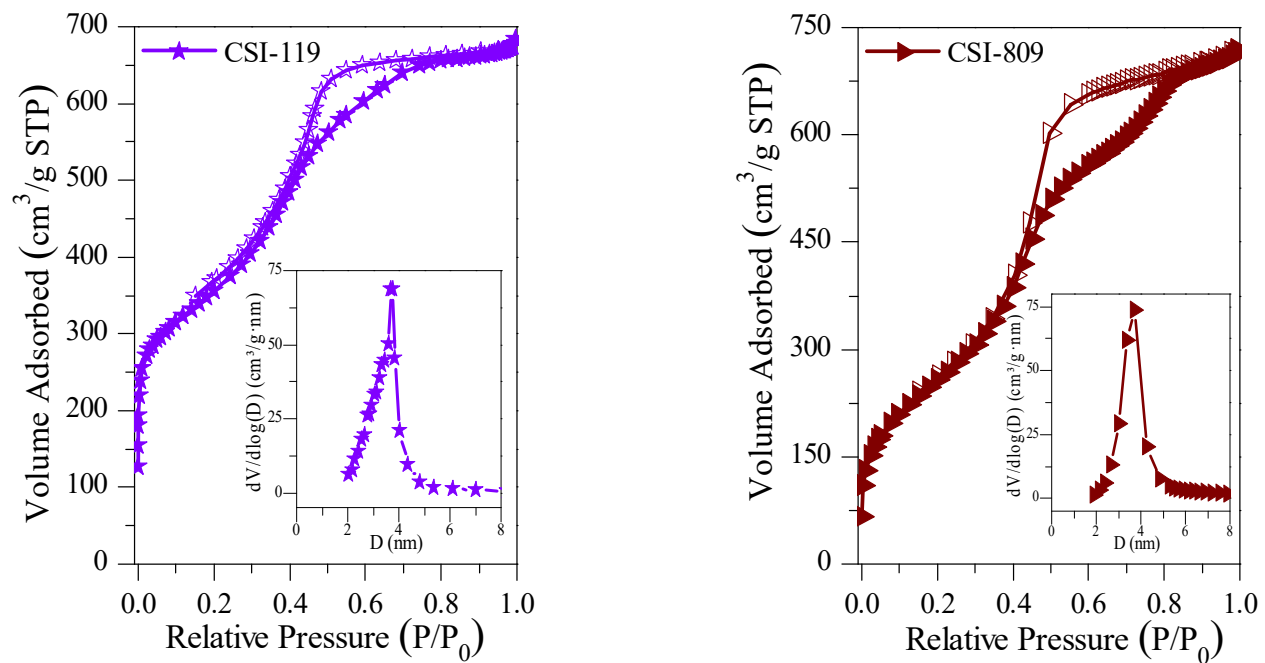

**Figure S2.** N<sub>2</sub>-sorption isotherm of various 3D-cubic OMCs pyrolyzed at 900°C. Inset: BJH pore size distribution.

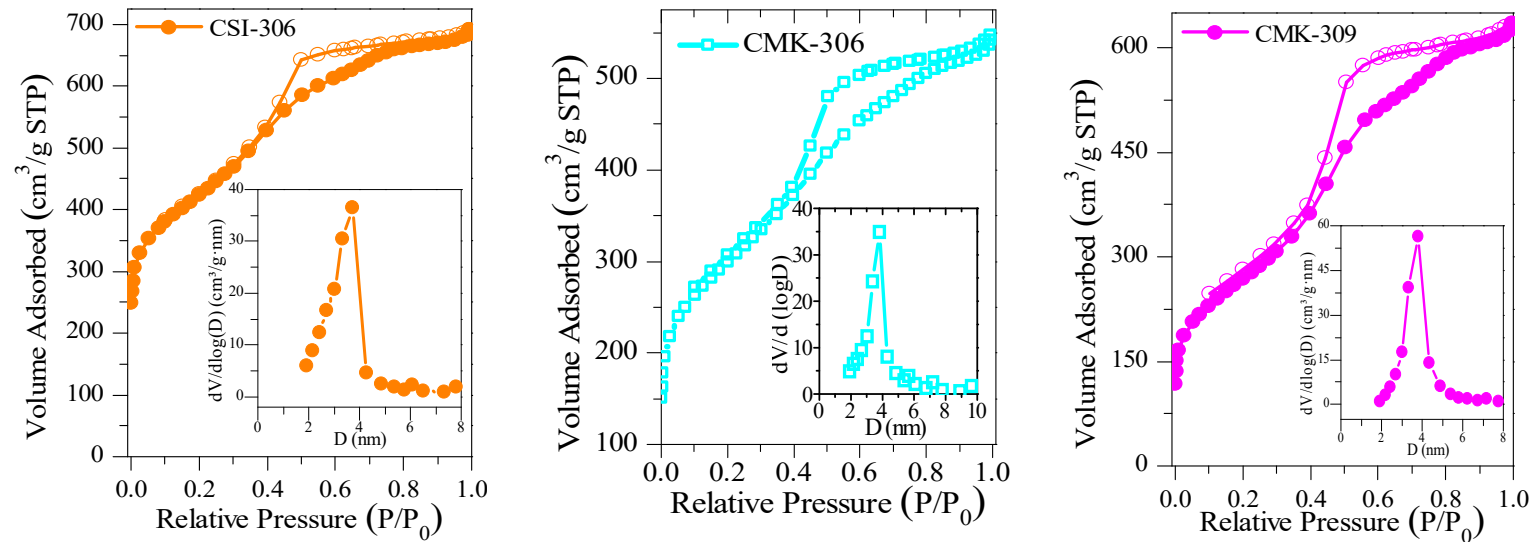

**Figure S3.** N<sub>2</sub>-sorption isotherm of various 1-D hexagonal OMCs pyrolysed at 600 and 900°C. Inset - BJH pore size distribution.

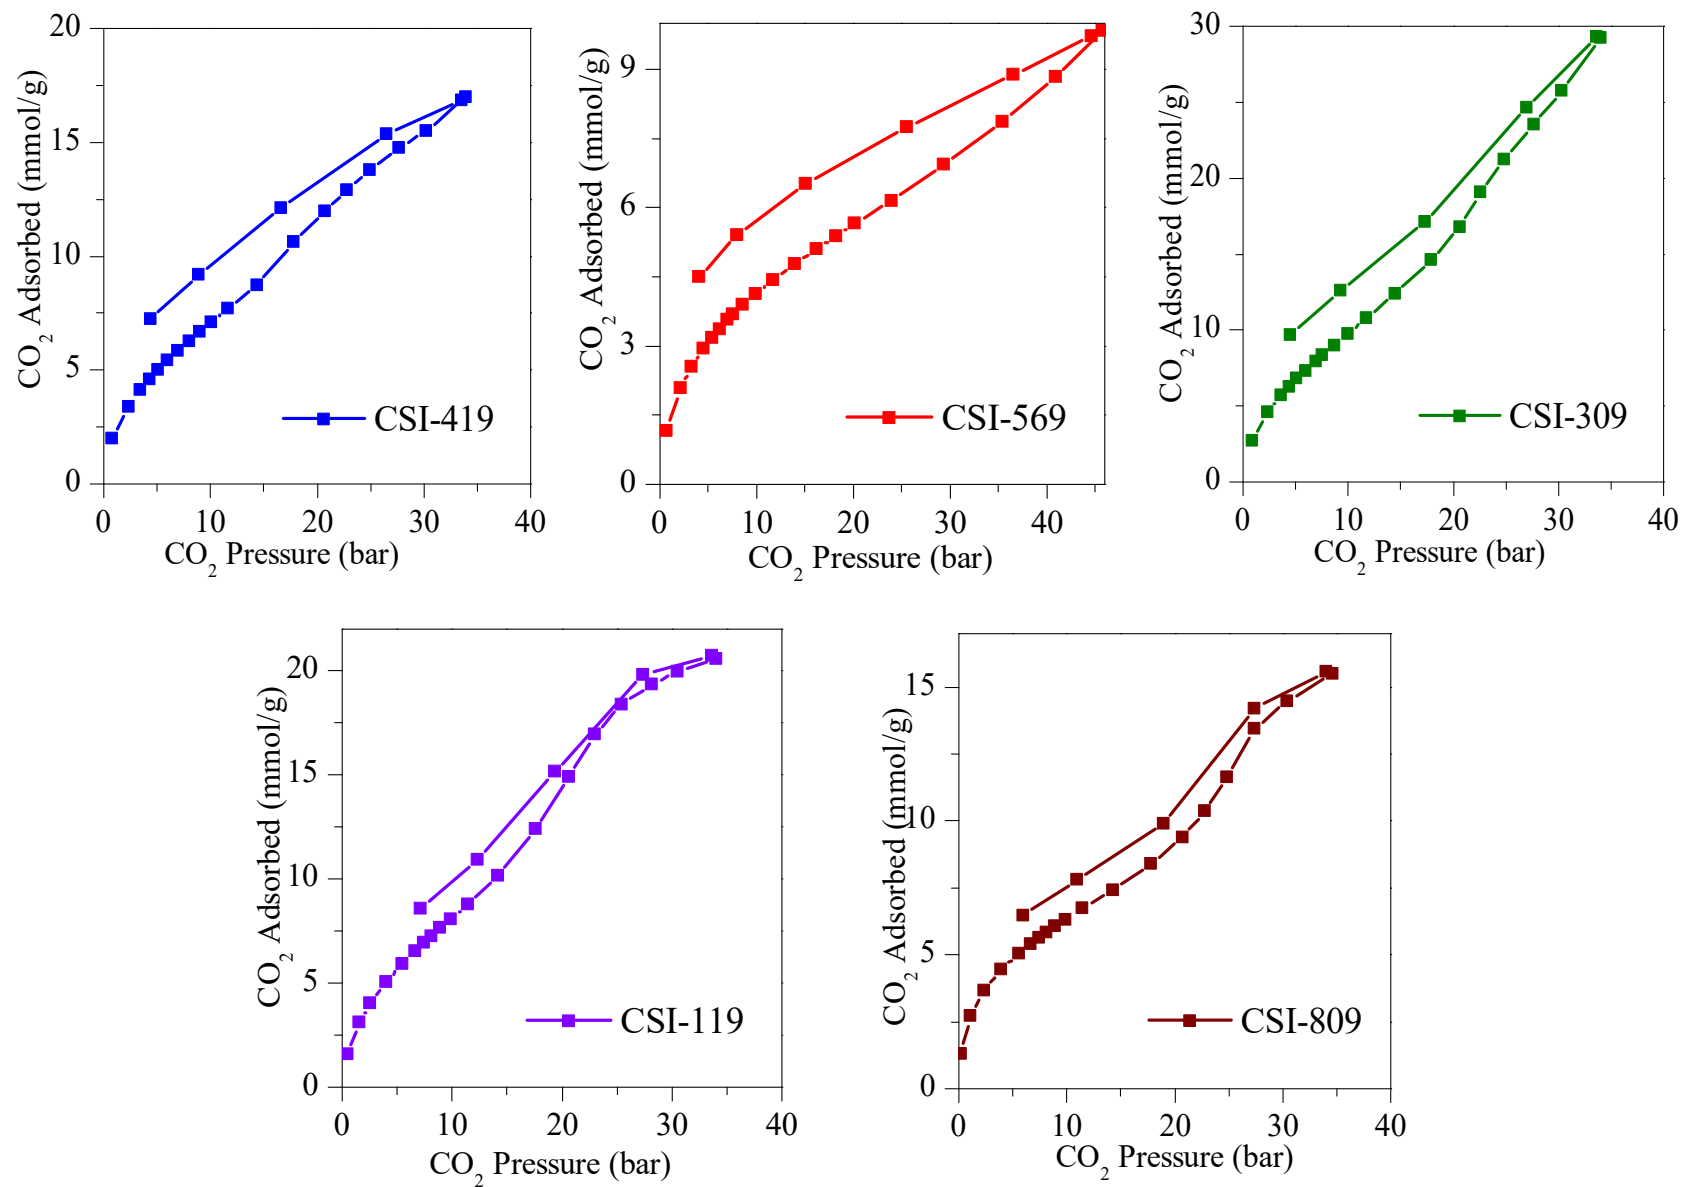

**Figure S4.** Experimental CO<sub>2</sub> adsorption-desorption isotherms at 0°C for various 1-D hexagonal and 3-D cubic OMCs pyrolyzed at 900°C.

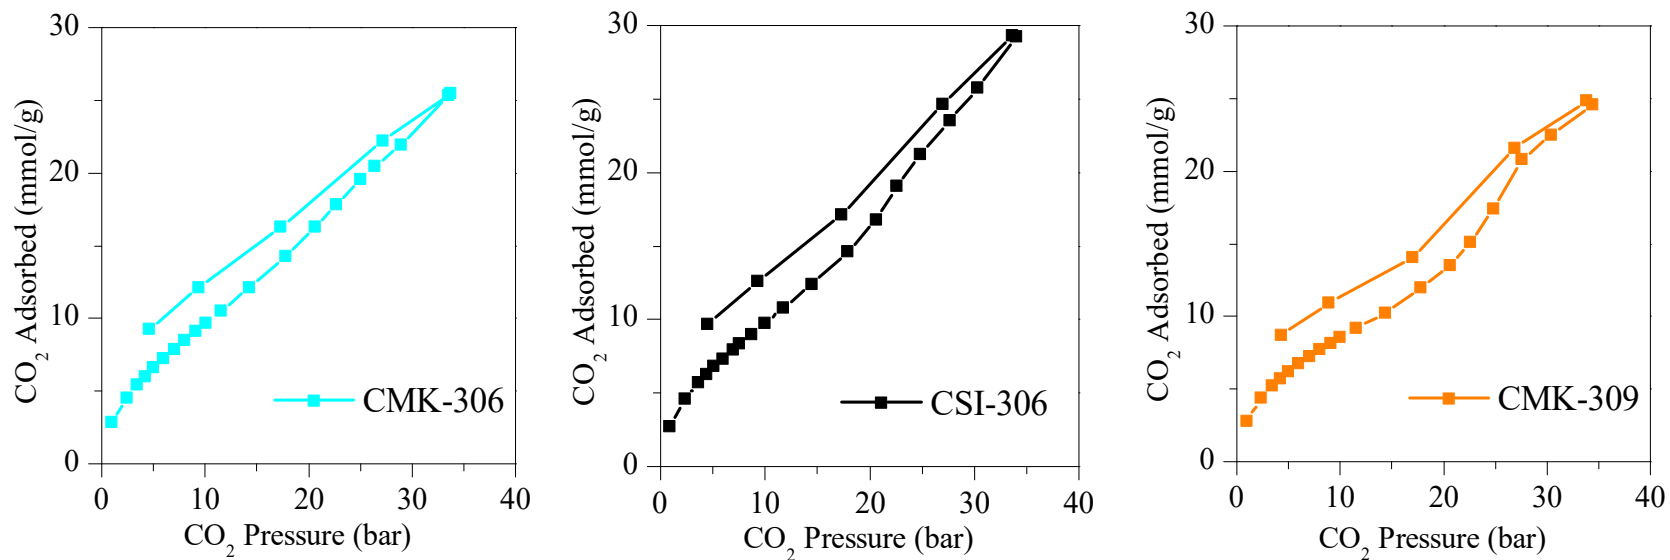

**Figure S5.** Experimental CO<sub>2</sub> adsorption-desorption isotherms measured at 0°C for various 1-D hexagonal OMCs pyrolysed at 600 and 900°C.

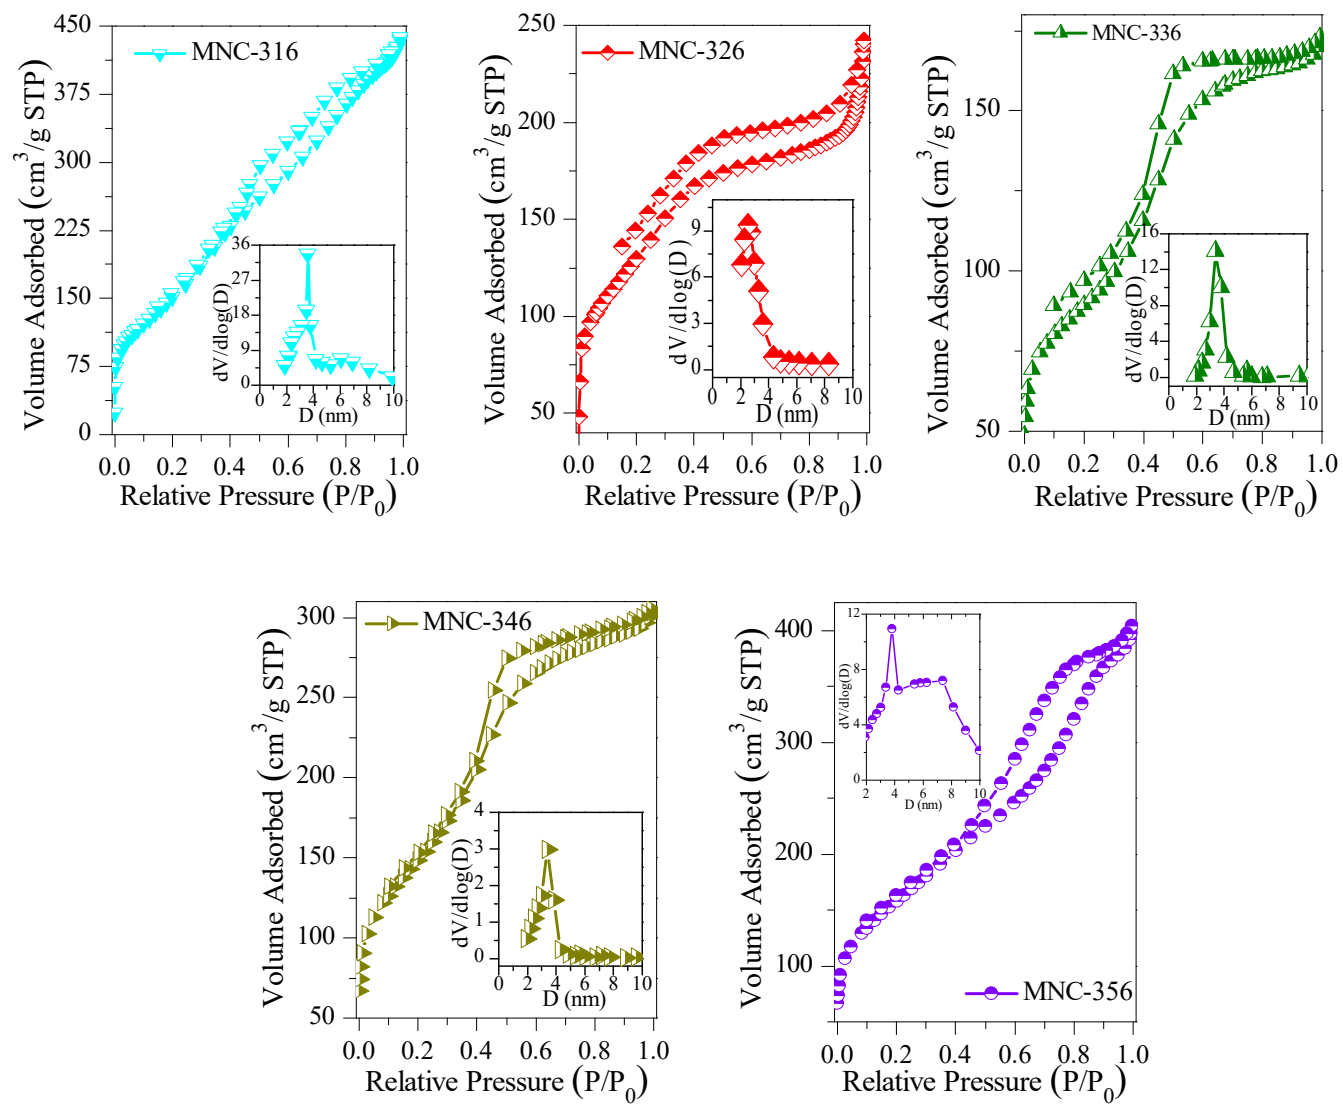

**Figure S6.** N<sub>2</sub>-sorption isotherms of various 1-D hexagonal MNCs pyrolysed at 600°C. Inset: BJH pore size distributions.

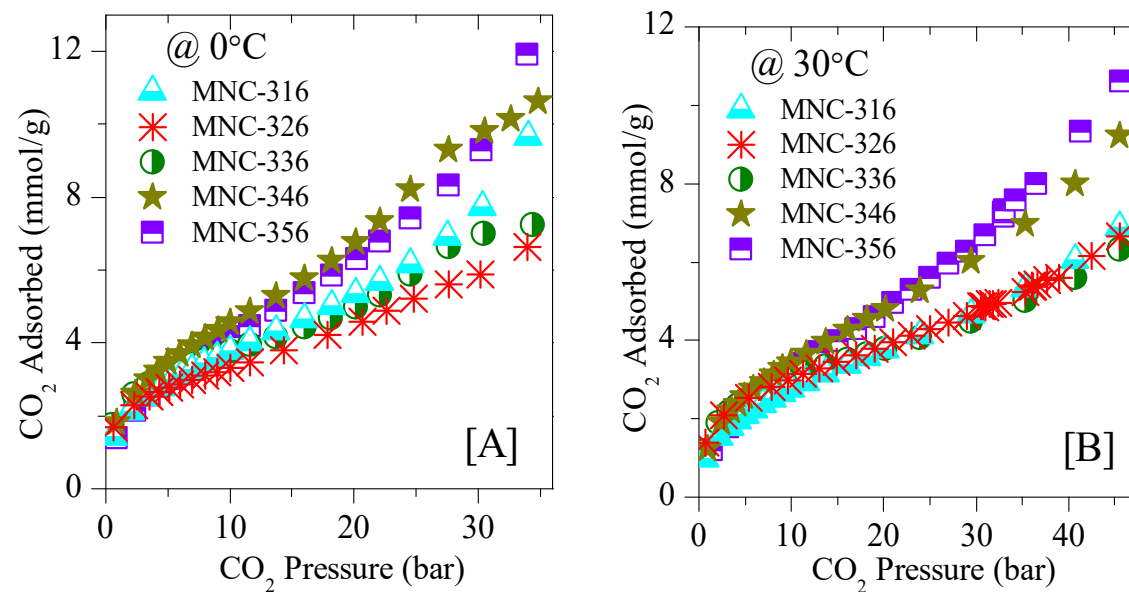

**Figure S7.** Experimental CO<sub>2</sub> excess adsorption isotherm measurements of nitrogen-doped OMCs at [A] 0°C and [B] RT.



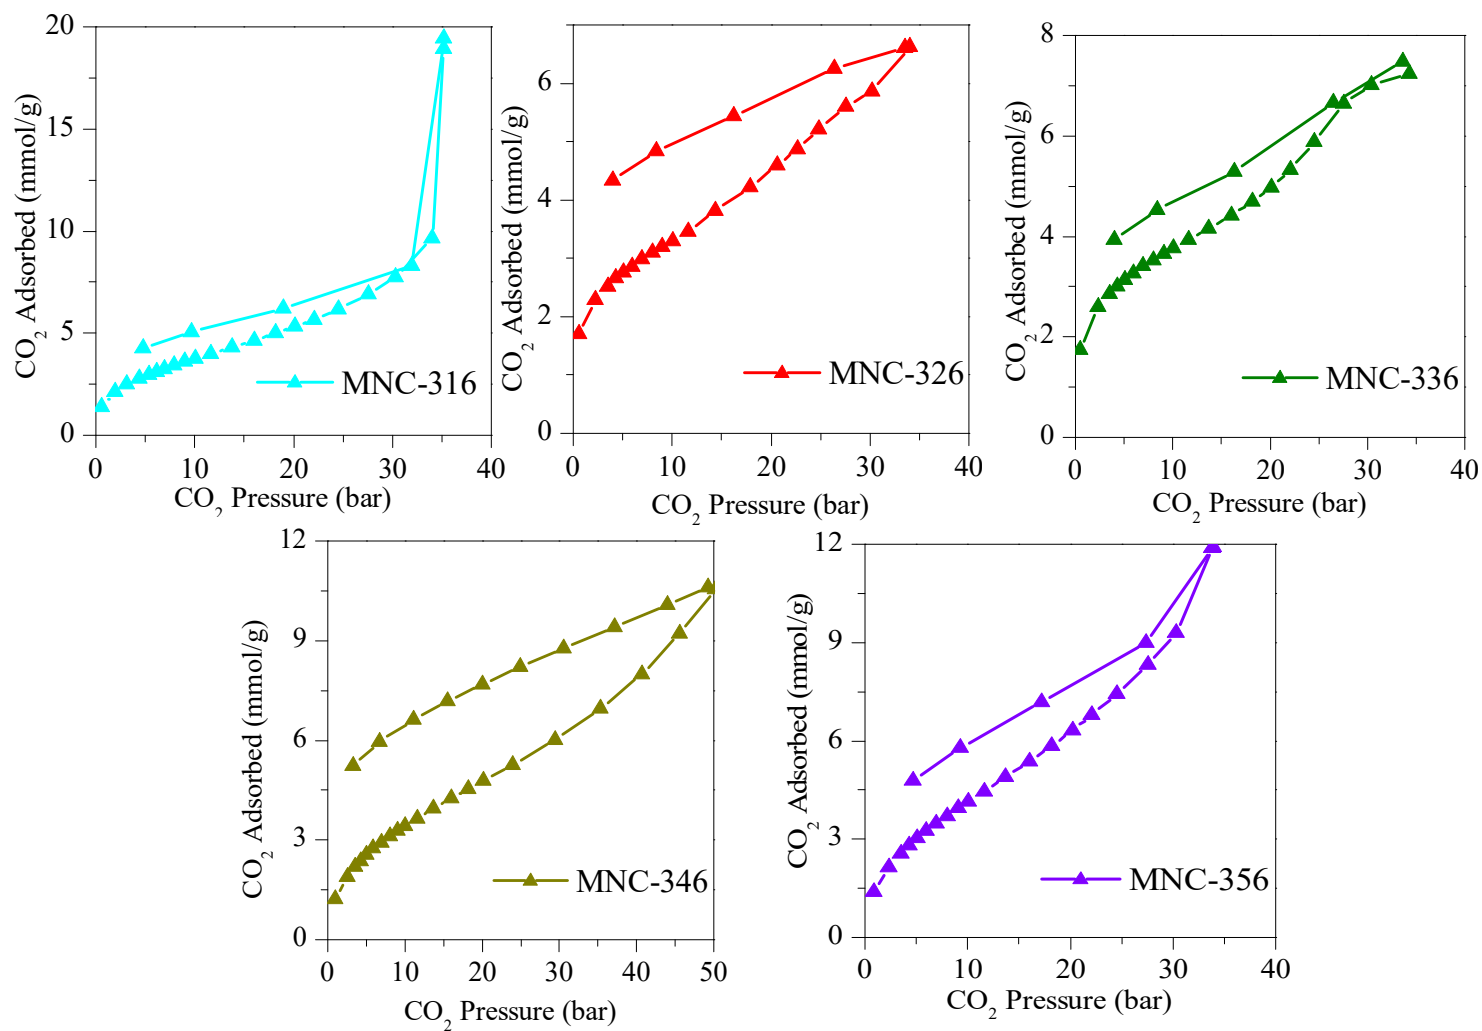

**Figure S8.** Experimental CO<sub>2</sub> adsorption-desorption isotherms measured at 0°C for various 1D-hexagonal MNCs pyrolysed at 600°C.

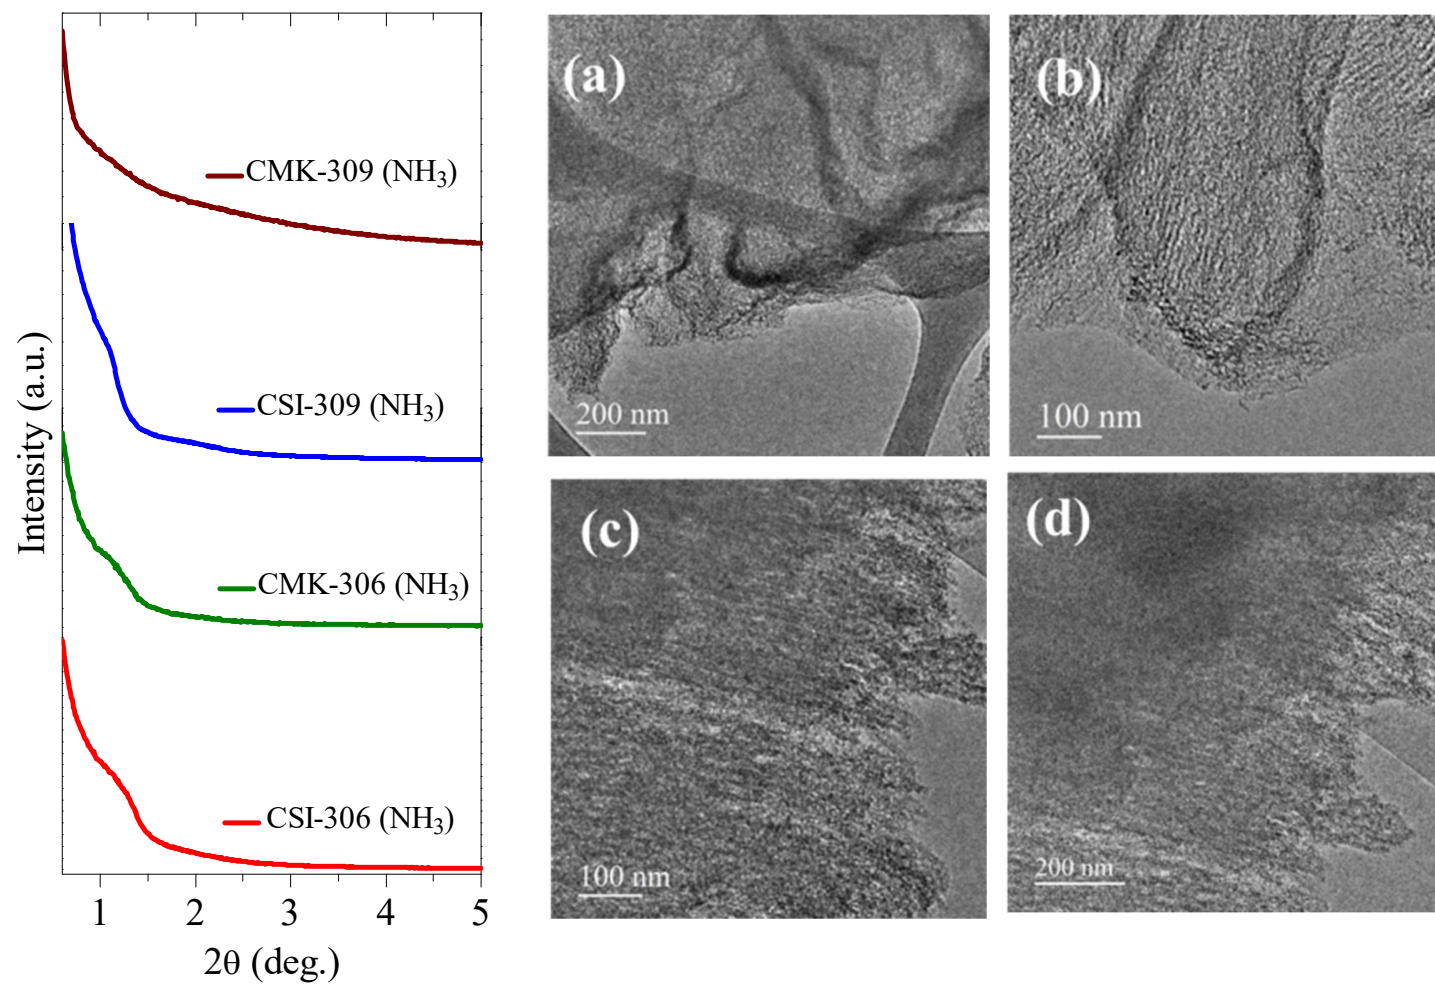

**Figure S9.** Low angle XRD patterns of ammonia post-synthesized carbons and HRTEM images of: (a) CSI-306 (NH<sub>3</sub>) (b) CSI-309 (NH<sub>3</sub>) (c) CMK-306 (NH<sub>3</sub>) (d) CMK-309 (NH<sub>3</sub>).

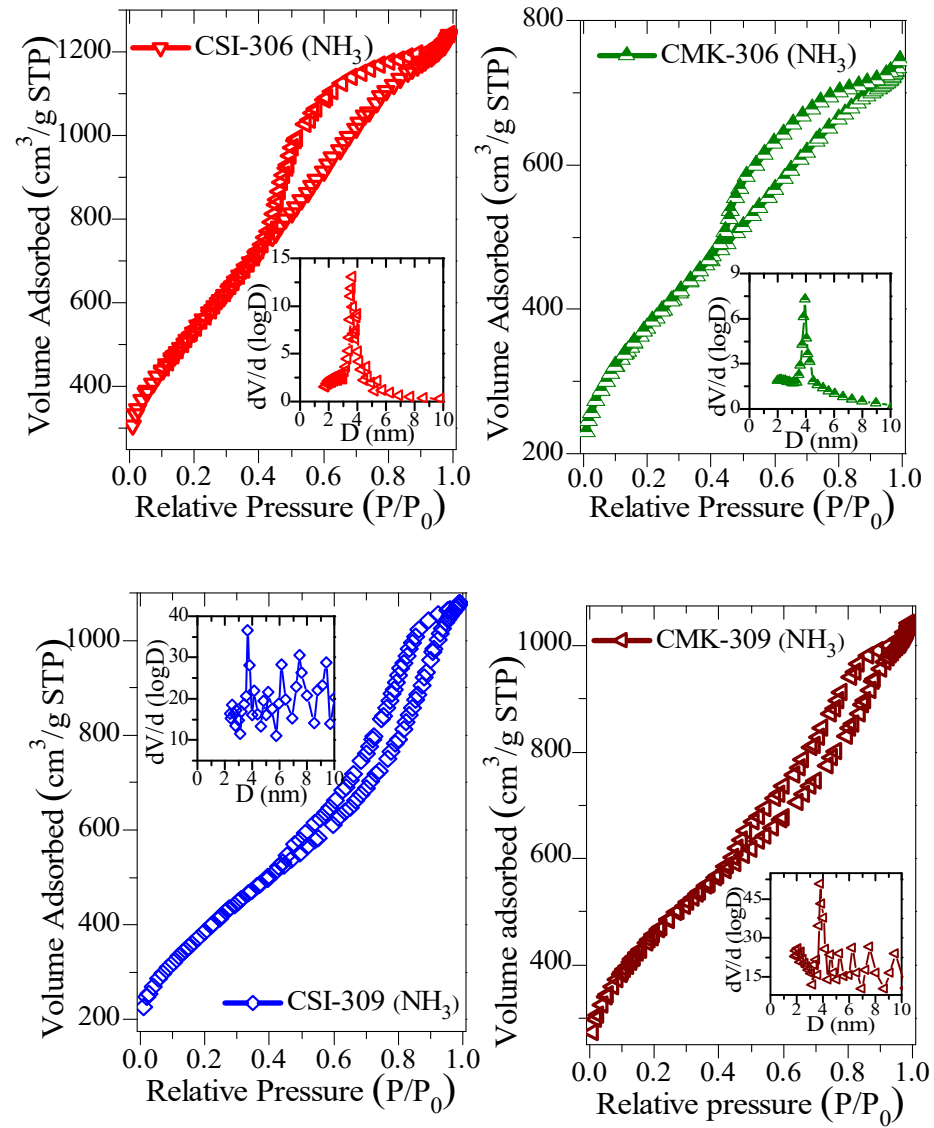

**Figure S10.** N<sub>2</sub> adsorption-desorption isotherms of ammonia-activated OMCs. Inset: BJH pore size distribution.

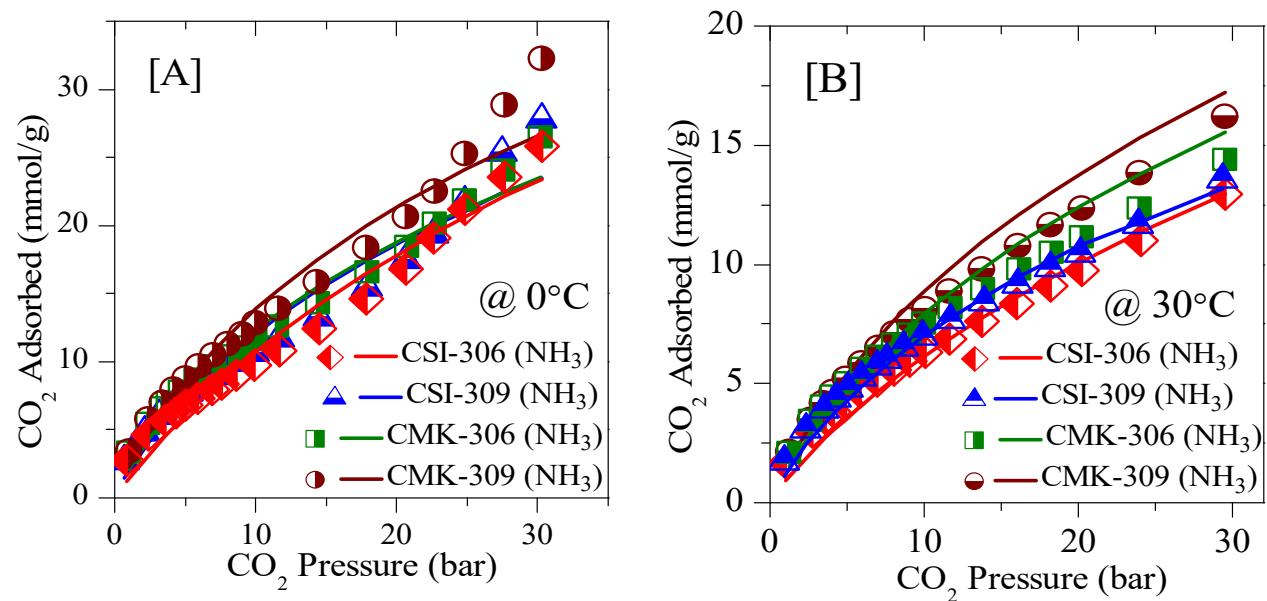

**Figure S11.** Experimental CO<sub>2</sub> excess adsorption isotherm measurements (solid symbols) and modified Toth fit (solid lines) of ammonia-activated carbons at [A] 0°C and [B] RT.

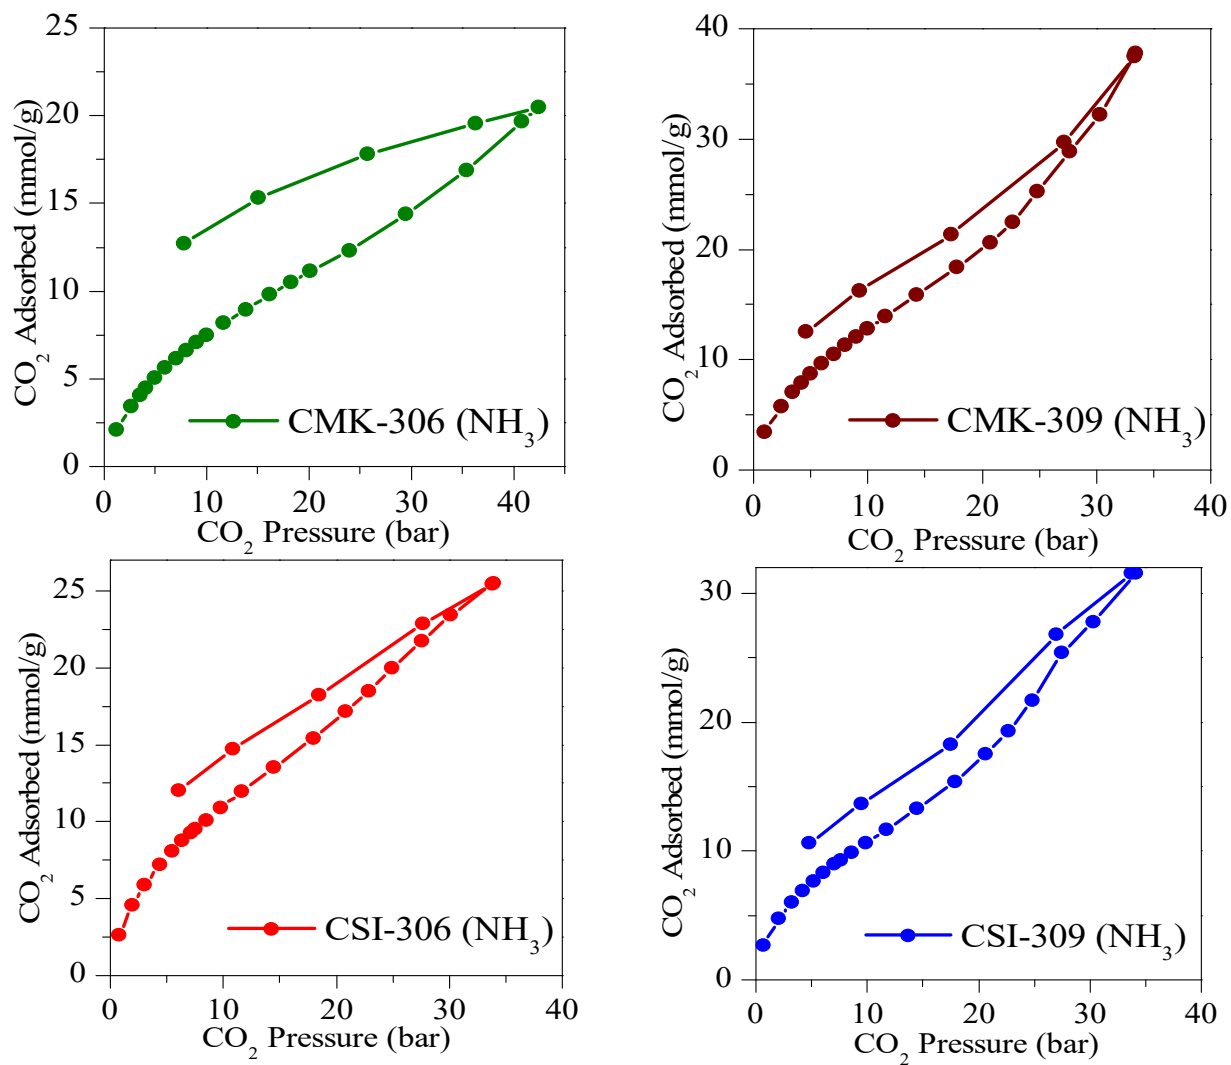

**Figure S12.** Experimental CO<sub>2</sub> adsorption-desorption isotherms measured at 0°C for various ammonia-activated 1D-hexagonal OMCs.

**Table S1.** Literature review on carbon dioxide storage on various porous carbon materials.

| Adsorbent                            | Template      | Source                                                          | $S_{BET}$<br>( $m^2g^{-1}$ ) | $V_p$<br>( $cm^3g^{-1}$ ) | N<br>(at %) | CO <sub>2</sub> uptake,<br>mmol/g (bar) |           | Ref. |
|--------------------------------------|---------------|-----------------------------------------------------------------|------------------------------|---------------------------|-------------|-----------------------------------------|-----------|------|
|                                      |               |                                                                 |                              |                           |             | 25°C                                    | 0°C       |      |
| <i>Ordered mesoporous carbons</i>    |               |                                                                 |                              |                           |             |                                         |           |      |
| CMK-3                                | SBA-15        | Sucrose                                                         | 970                          | 0.81                      | --          | 2.4 (1)                                 | 3.2 (1)   | [1]  |
| CMK-3                                | SBA-15        | Sucrose                                                         | 1491                         | 1.34                      | --          | 6.4 (10)                                | --        | [2]  |
| CMK-3                                | SBA-15        | Sucrose                                                         | 1115                         | 1.15                      | --          | 18.6 (35)                               | --        | [3]  |
| CMK-3-150                            | SBA-15-mw     | Sucrose                                                         | 1205                         | 1.46                      | --          | --                                      | 24.4 (30) | [4]  |
| CMK-3                                | SBA-15        | Sucrose                                                         | 1491                         | 1.30                      | --          | 14.6 (40)                               | --        | [5]  |
| CMK-8                                | KIT-6         | Sucrose                                                         | 1020                         | 0.91                      | --          | 2.1 (1)                                 | --        | [1]  |
| EPC-1                                | EPG-1         | Sucrose                                                         | 1551                         | 1.41                      | --          | --                                      | 26.3 (30) | [6]  |
| <i>Nitrogen-doped porous carbons</i> |               |                                                                 |                              |                           |             |                                         |           |      |
| PVA-CMK-3                            | CMK-3         | N-vinylformamide/AIBN                                           | 711                          | 0.46                      | --          | 3.5 (1)                                 | --        | [7]  |
| CS-6-CD-4                            | Silica sphere | Resorcinol/HCHO/NH <sub>3</sub>                                 | 661                          | 0.30                      | --          | 2.5 (1)                                 | --        | [8]  |
| NMC-M/P-0.5                          | LudoxSM-30    | Melamine/Phenol/HCHO                                            | 777                          | 2.3                       | 4.3         | 1.5 (1)                                 | 2.0 (1)   | [9]  |
| Meso-CN                              | MCF           | Ethylenediamine/CCl <sub>4</sub>                                | 502                          | 2.30                      | 17.8        | 2.5 (1)                                 | --        | [10] |
| RFL-500                              | --            | Resorcinol/HCHO                                                 | 467                          | 0.23                      | 1.9         | 3.1 (1)                                 | --        | [11] |
| MF-700                               | MCM-41 type   | Melamine/Methanol/HCHO<br>/Borax/K <sub>2</sub> CO <sub>3</sub> | 266                          | 0.25                      | 21          | 0.8 (1)                                 | --        | [12] |
| NOMC-800                             | F127          | Urea/Phenol/Resorcinol                                          | 645                          | 0.36                      | 2.4         | 2.5 (1)                                 | 3.3 (1)   | [13] |
| NOMC-0.1                             | F127          | Urea/Phenol/HCHO                                                | 566                          | 0.31                      | 0.9         | 2.4 (1)                                 | --        | [14] |
| NOMC-700                             | SBA-15        | Ethylviolet/Sulfuric acid                                       | 959                          | 1.49                      | 12.9        | 8.8 (30)                                | 18.1 (30) | [15] |

| Adsorbent                                            | Template       | Source                                                          | S <sub>BET</sub><br>(m <sup>2</sup> g <sup>-1</sup> ) | V <sub>p</sub><br>(cm <sup>3</sup> g <sup>-1</sup> ) | N<br>(at %) | CO <sub>2</sub> uptake,<br>mmol/g (bar) |           | Ref.      |
|------------------------------------------------------|----------------|-----------------------------------------------------------------|-------------------------------------------------------|------------------------------------------------------|-------------|-----------------------------------------|-----------|-----------|
|                                                      |                |                                                                 |                                                       |                                                      |             | 25°C                                    | 0°C       |           |
| MCN-1                                                | SBA-15         | Ethylenediamine/CCl <sub>4</sub>                                | 738                                                   | 0.92                                                 | 6.2         | 9.1 (30)                                | 20.1 (30) | 16], [17] |
| MNC-7                                                | FDU-12         | Ethylenediamine/CCl <sub>4</sub>                                | 901                                                   | 1.02                                                 | 19.0        | 5.9 (30)                                | 13.5 (30) | [18]      |
| IBN9-NC                                              | IBN-9          | <i>p</i> -diaminobenzene                                        | 890                                                   | 0.68                                                 | 18.8        | 5.2 (8)                                 | --        | [19]      |
| PAC-800                                              | SBA-15         | 3-aminobenzoic acid                                             | 1137                                                  | 1.28                                                 | 6.3         | 2.0 (1)                                 | 5.04 (1)  | [20]      |
| MCN-8E-150 <sup>‡</sup>                              | KIT-6          | 3-amino-1,2,4-triazole                                          | 232                                                   | 3.50                                                 | 61.0        | 1.5 (30)                                | 5.6 (30)  | [16]      |
| <b>Physically activated carbons (CO<sub>2</sub>)</b> |                |                                                                 |                                                       |                                                      |             |                                         |           |           |
| CS-6-CD-4                                            | Silica spheres | Resorcinol/HCHO/NH <sub>3</sub>                                 | 2284                                                  | 0.89                                                 | --          | 4.5 (1)                                 | 8.05 (1)  | [8]       |
| MFZ-700                                              | MCM-41<br>type | Melamine/Methanol/HCHO<br>/Borax/K <sub>2</sub> CO <sub>3</sub> | 193                                                   | 0.32                                                 | 22.7        | 0.9 (1)                                 | --        | [21]      |
| <b>Chemically activated carbons (KOH)</b>            |                |                                                                 |                                                       |                                                      |             |                                         |           |           |
| ATS-2-700                                            | SBA-15         | Sucrose                                                         | 1330                                                  | 0.73                                                 | --          | 3.3 (1)                                 | 5.8 (1)   | [1]       |
| ATK-4-800                                            | KIT-6          | Sucrose                                                         | 2660                                                  | 1.38                                                 | --          | 3.1 (1)                                 | 5.4 (1)   | [1]       |
| NOMC-0.1                                             | F127           | Urea/Phenol/HCHO                                                | 1790                                                  | 0.94                                                 | --          | 4.3 (1)                                 | --        | [14]      |
| NOMC-800                                             | F127           | Melamine/Resorcinol/HCHO                                        | 1413                                                  | 0.72                                                 | --          | 4.6 (1)                                 | 3.1 (1)   | [13]      |
| PIF-6                                                | CTAB           | Indole/Ammonium persulphate                                     | 527                                                   | 0.20                                                 | 4.1         | 2.9 (1)                                 | 3.2 (1)   | [22]      |
| IBN9-NC1-A                                           | IBN-9          | <i>p</i> -diaminobenzene/Furfuryl alcohol                       | 1181                                                  | 0.73                                                 | 12.9        | 10.5 (8)                                | --        | [19]      |
| NPC-650                                              | --             | <i>m</i> -diaminobenzene                                        | 1561                                                  | 0.75                                                 | 4.1         | 3.1 (1)                                 | 5.3 (1)   | [23]      |

<sup>‡</sup>g-C<sub>3</sub>N<sub>4</sub>; <sup>§</sup>At 30°C.

**Table S2.** Modeling parameters for carbon dioxide storage on various mesoporous carbon materials.

| Adsorbent                  | Toth model fitting parameters |            |         |       |          |       | CO <sub>2</sub> uptake, <i>mmol/g</i> |                 |
|----------------------------|-------------------------------|------------|---------|-------|----------|-------|---------------------------------------|-----------------|
|                            | $b_0 \times 10^{-8}$          | $n_{\max}$ | $Q$     | $t_0$ | $\alpha$ | $R^2$ | 30°C<br>(45 bar)                      | 0°C<br>(34 bar) |
| CSI-809                    | 6.6                           | 70.8       | 4001    | 0.38  | -0.51    | 0.95  | 10.7                                  | 15.5            |
| CSI-119                    | 3.54                          | 76.4       | 4004    | 0.60  | -1.74    | 0.97  | 14.8                                  | 20.7            |
| CSI-419                    | 2.80                          | 48.12      | 5077    | 0.66  | -1.80    | 0.98  | 13.3                                  | 16.9            |
| CSI-569                    | 5.87                          | 64.7       | 4008    | 0.41  | -0.79    | 0.97  | 9.8                                   | 13.2            |
| CSI-309                    | 5.86                          | 99         | 7768    | 0.524 | -0.73    | 0.97  | 17.8                                  | 25.4            |
| CMK-309                    | 5.25                          | 86         | 8100    | 0.57  | -0.89    | 0.94  | 14.4 <sup>†</sup>                     | 24.4            |
| CSI-306                    | 6.75                          | 89.24      | 7242    | 0.724 | -2.17    | 0.97  | 22.5                                  | 27.5            |
| CMK-306                    | 5.30                          | 83.5       | 8291    | 0.6   | -0.79    | 0.95  | 16.3                                  | 25.4            |
| CSI-306 (NH <sub>3</sub> ) | 2.39                          | 65.8       | 13148   | 0.45  | -0.44    | 0.95  | 20.8                                  | 29.3            |
| CSI-309 (NH <sub>3</sub> ) | 1.60                          | 85.9       | 6422    | 0.57  | -1.40    | 0.95  | 21.5                                  | 31.5            |
| CMK-306 (NH <sub>3</sub> ) | 5.22                          | 84.2       | 9175.88 | 0.56  | -0.72    | 0.97  | 16.6                                  | 29.0            |
| CMK-309 (NH <sub>3</sub> ) | 1.42                          | 89.94      | 6912.09 | 0.59  | -1.03    | 0.95  | 23.1                                  | 37.8            |
| MNC-316                    | 2.20                          | 94.72      | 4008.3  | 0.21  | -0.16    | 0.96  | 6.9                                   | 9.6             |
| MNC-326                    | 3.08                          | 45.25      | 15207   | 0.17  | 0.04     | 0.94  | 6.6                                   | 6.7             |
| MNC-336                    | 1.39                          | 40.37      | 15052   | 0.208 | -0.017   | 0.93  | 6.3                                   | 7.3             |
| MNC-346                    | 8.50                          | 99         | 9423.16 | 0.26  | -0.13    | 0.95  | 9.2                                   | 10.4            |
| MNC-356                    | 1.25                          | 61.4       | 6837.77 | 0.36  | -0.27    | 0.95  | 10.6                                  | 11.9            |



**Table S3.** Structural and textural properties of various 1-D hexagonal and 3-D cubic ordered mesoporous silicas [24].

| <b>Hard (OMS) templates</b> | $a_0$<br>(nm) <sup>†</sup> | $S_{\text{BET}}$<br>(m <sup>2</sup> g <sup>-1</sup> ) <sup>‡</sup> | $V_p$<br>(cm <sup>3</sup> g <sup>-1</sup> ) <sup>§</sup> | $D_{\text{BJH}}$<br>(nm) <sup>¶</sup> | $D_{\text{TEM}}$<br>(nm) <sup>§</sup> |
|-----------------------------|----------------------------|--------------------------------------------------------------------|----------------------------------------------------------|---------------------------------------|---------------------------------------|
| MCM-41                      | 4.2                        | 966                                                                | 0.86                                                     | 2.5                                   | 2.6                                   |
| IITM-56                     | 6.0                        | 758                                                                | 0.89                                                     | 3.8                                   | 3.6                                   |
| SBA-15                      | 10.1                       | 576                                                                | 0.96                                                     | 6.4                                   | 6.5                                   |
| SBA-11                      | 13.7                       | 671                                                                | 0.69                                                     | 1.9                                   | 2.1                                   |
| KIT-6                       | 20.0                       | 785                                                                | 1.07                                                     | 6.8                                   | 6.7                                   |

<sup>†</sup>For hexagonal system:  $a_0 = 2d_{100}/\sqrt{3}$ . For cubic system:  $a_0 = d \times (h^2+l^2+k^2)^{1/2}$ . <sup>‡</sup> $S_{\text{BET}}$  = Surface area calculated using BET equation. <sup>§</sup> $V_p$  = Total pore volume. <sup>¶</sup> $D_{\text{BJH}}$  = Pore size determined using BJH method. <sup>§</sup> $D_{\text{TEM}}$  = Pore size determined using TEM.

## References

1. M. Sevilla and A. B. Fuertes, *Journal of Colloid and Interface Science*, 2012, **366**, 147-154.
2. C.-C. Huang and S.-C. Shen, *Journal of the Taiwan Institute of Chemical Engineers*, 2013, **44**, 89-94.
3. J. Zhou, W. Su, Y. Sun, S. Deng and X. Wang, *Journal of Chemical & Engineering Data*, 2016, **61**, 1348-1352.
4. K. S. Lakhi, W. S. Cha, J.-H. Choy, M. Al-Ejji, A. M. Abdullah, A. M. Al-Enizi and A. Vinu, *Microporous and Mesoporous Materials*, 2016, **233**, 44-52.
5. G. Chandrasekar, W.-J. Son and W.-S. Ahn, *Journal of Porous Materials*, 2009, **16**, 545-551.
6. Y.-R. Pei, G. Choi, S. Asahina, J.-H. Yang, A. Vinu and J.-H. Choy, *Chemical Communications*, 2019, **55**, 3266-3269.
7. C.-C. Hwang, Z. Jin, W. Lu, Z. Sun, L. B. Alemany, J. R. Lomeda and J. M. Tour, *ACS Applied Materials & Interfaces*, 2011, **3**, 4782-4786.
8. N. P. Wickramaratne and M. Jaroniec, *ACS Applied Materials & Interfaces*, 2013, **5**, 1849-1855.
9. H. Chen, F. Sun, J. Wang, W. Li, W. Qiao, L. Ling and D. Long, *The Journal of Physical Chemistry C*, 2013, **117**, 8318-8328.
10. Q. Li, J. Yang, D. Feng, Z. Wu, Q. Wu, S. S. Park, C.-S. Ha and D. Zhao, *Nano Research*, 2010, **3**, 632-642.
11. G.-P. Hao, W.-C. Li, D. Qian and A.-H. Lu, *Advanced Materials*, 2010, **22**, 853-857.
12. C. Goel, H. Bhunia and P. K. Bajpai, *RSC Advances*, 2015, **5**, 46568-46582.
13. J. Yu, M. Guo, F. Muhammad, A. Wang, F. Zhang, Q. Li and G. Zhu, *Carbon*, 2014, **69**, 502-514.
14. A. Chen, Y. Yu, Y. Zhang, W. Zang, Y. Yu, Y. Zhang, S. Shen and J. Zhang, *Carbon*, 2014, **80**, 19-27.
15. S. Zhou, H. Xu, Q. Yuan, H. Shen, X. Zhu, Y. Liu and W. Gan, *ACS Appl. Mater. Interfaces*, 2016, **8**, 918-926.
16. D.-H. Park, K. S. Lakhi, K. Ramadass, M.-K. Kim, S. N. Talapaneni, S. Joseph, U. Ravon, K. Al-Bahily and A. Vinu, *Chemistry – A European Journal*, 2017, **23**, 10753-10757.
17. K. S. Lakhi, A. V. Baskar, J. S. M. Zaidi, S. S. Al-Deyab, M. El-Newehy, J.-H. Choy and A. Vinu, *RSC Advances*, 2015, **5**, 40183-40192.
18. K. S. Lakhi, W. S. Cha, S. Joseph, B. J. Wood, S. S. Aldeyab, G. Lawrence, J.-H. Choy and A. Vinu, *Catalysis Today*, 2015, **243**, 209-217.

19. Y. Zhao, L. Zhao, K. X. Yao, Y. Yang, Q. Zhang and Y. Han, *Journal of Materials Chemistry*, 2012, **22**, 19726-19731.
20. Á. Sánchez-Sánchez, F. Suárez-García, A. Martínez-Alonso and J. M. D. Tascón, *ACS Applied Materials & Interfaces*, 2014, **6**, 21237-21247.
21. D. Tiwari, C. Goel, H. Bhunia and P. K. Bajpai, *Journal of Environmental Management*, 2017, **197**, 415-427.
22. M. Saleh, J. N. Tiwari, K. C. Kemp, M. Yousuf and K. S. Kim, *Environmental Science & Technology*, 2013, **47**, 5467-5473.
23. J. Wang, I. Senkowska, M. Oschatz, M. R. Lohe, L. Borchardt, A. Heerwig, Q. Liu and S. Kaskel, *Journal of Materials Chemistry A*, 2013, **1**, 10951-10961.
24. T.V.R. Mohan, PhD Thesis, IIT-Madras, 2021.
